# Supplementary material for: Perinatal Impacts of Cannabis and Nicotine: An Analysis of the Cannabis Use During Development and Early Life Study
Source: bioRxiv or medRxiv preprint supplement (doi:10.1101/2024.03.29.24305025), 2024-03-30
Supplement: Supplementary file [file media-1.pdf]

## APPENDICES

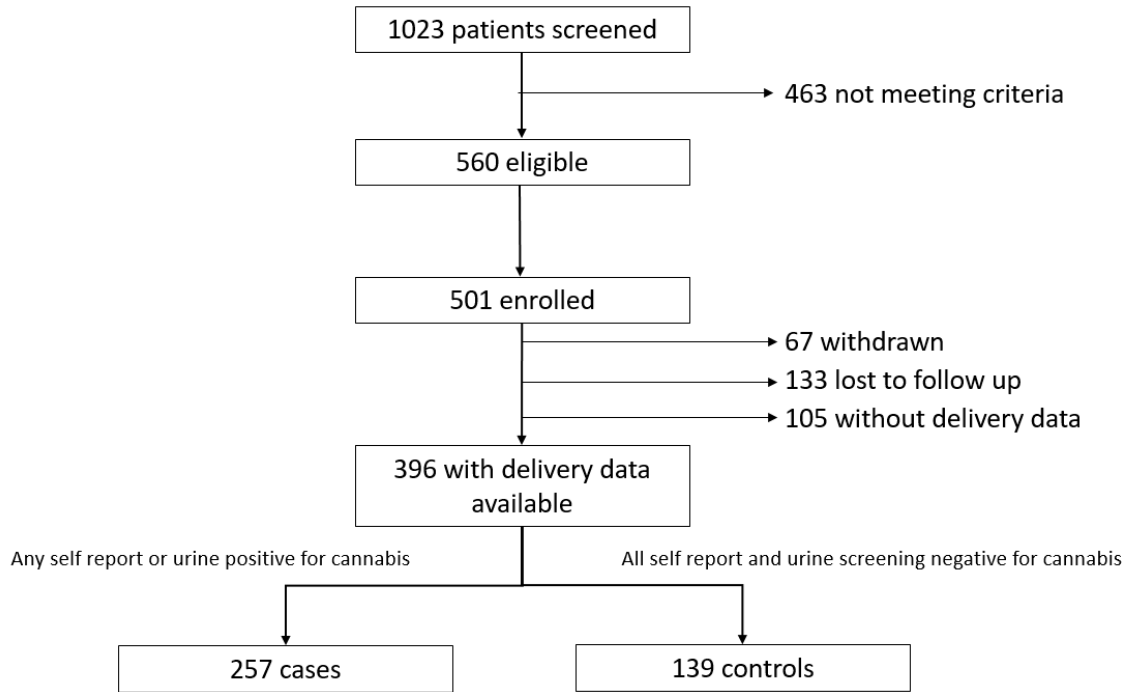

|                                             | PCU-H (N = 77)   | Controls (N = 137) | P value |
|---------------------------------------------|------------------|--------------------|---------|
| Maternal age (years)                        | 25.6 [18.8-37.4] | 27.8 [18.7-40.5]   | 0.0033  |
| AMA                                         | 1 (1.3%)         | 12 (8.63%)         | 0.03    |
| Teen                                        | 8 (10.4%)        | 6 (4.32%)          | 0.082   |
| Maternal BMI at intake (kg/m <sup>2</sup> ) | 28.7 [17.1-57.3] | 33 [14.8-79.1]     | 0.0049  |
| Education beyond high school                | 26 (33.8%)       | 66 (50%)           | 0.023   |
| Marital status                              |                  |                    | 0.495   |
| Single                                      | 20 (60.6%)       | 32 (54.2%)         |         |
| Partnered/Married                           | 11 (33.3%)       | 25 (42.4%)         |         |
| Divorced/Separated                          | 1 (3%)           | 2 (3.4%)           |         |
| Widowed                                     | 0                | 0                  |         |
| Other                                       | 1 (3%)           | 0                  |         |
| ADI (national)                              | 81.4 [31-100]    | 79.3 [17-100]      | 0.66    |
| ADI >=75%ile                                |                  |                    | 0.490   |
| Race                                        |                  |                    | 0.59    |
| Black or African American                   | 66 (85.7%)       | 113 (81.3%)        |         |
| White                                       | 11 (14.3%)       | 23 (16.6%)         |         |
| American Indian/Alaska N                    | 0                | 0                  |         |
| Asian                                       | 0                | 2 (1.4%)           |         |
| Hawaiian N. & Pacific Is.                   | 0                | 0                  |         |
| Other                                       | 0                | 1 (0.7%)           |         |
| Ethnicity                                   |                  |                    | 0.059   |

|                                                                                                                                  |              |              |        |
|----------------------------------------------------------------------------------------------------------------------------------|--------------|--------------|--------|
| Hispanic                                                                                                                         | 1 (1.3%)     | 10 (7.2%)    |        |
| Non-Hispanic                                                                                                                     | 76 (98.7%)   | 129 (92.8%)  |        |
| Gravity (median, [range])                                                                                                        | 2.7 [1-6]    | 3 [1-6]      | 0.4183 |
| Prior live births (median, [range])                                                                                              | 1 [0-4]      | 1 [0-5]      | 0.8915 |
| Concurrent medical conditions                                                                                                    |              |              |        |
| Chronic hypertension                                                                                                             | 14 (18.4%)   | 36 (27.1%)   | 0.159  |
| Chronic diabetes                                                                                                                 | 1 (1.45%)    | 9 (6.7%)     | 0.083  |
| Asthma                                                                                                                           | 21 (27.6%)   | 42 (30.9%)   | 0.619  |
| Anemia                                                                                                                           | 25 (33.3%)   | 51 (37.5%)   | 0.546  |
| Psychiatric diagnosis                                                                                                            | 32 (42.1%)   | 68 (50%)     | 0.269  |
| Prior obstetric outcomes                                                                                                         |              |              |        |
| Preterm birth                                                                                                                    | 15 (19.7%)   | 24 (17.7%)   | 0.706  |
| Hypertensive disorders of pregnancy                                                                                              | 17 (22.4%)   | 21 (15.6%)   | 0.216  |
| Gestational diabetes                                                                                                             | 2 (2.7%)     | 5 (4%)       | 0.643  |
| Cotinine positivity                                                                                                              | 42 (54.6%)   | 15 (10.8%)   | <0.00  |
| Gestational age at delivery (weeks)                                                                                              | 37.5 [27-41] | 37.5 [23-40] | 0.6370 |
| Attendance at 3 or more prenatal visits                                                                                          | 75 (99.7%)   | 136 (99.3%)  | 0.671  |
| Abbreviations: ADI, area of deprivation index; BMI, body mass index; kg, kilograms; m, meters; PCU-H, high prenatal cannabis use |              |              |        |
| *Other indicates that the participant did not self-report a specific race                                                        |              |              |        |

|                                                                                                                                           | PCU-H (n=77) | Controls (n=139) | RR (95% CI)      | *aRR (95% CI)    |
|-------------------------------------------------------------------------------------------------------------------------------------------|--------------|------------------|------------------|------------------|
| Antenatal Complications                                                                                                                   |              |                  |                  |                  |
| Gestational diabetes                                                                                                                      | 0 (0%)       | 10 (8.0%)        | N/A              | N/A              |
| Anemia                                                                                                                                    | 21 (87.5%)   | 40 (80%)         | 1.09 [0.89-1.34] | 1.06 [0.68-1.20] |
| Gestational hypertension                                                                                                                  | 19 (25%)     | 29 (21.6%)       | 1.16 [0.7-1.91]  | 1.05 [0.54-1.82] |
| Preeclampsia                                                                                                                              | 11 (14.7%)   | 21 (15.7%)       | 0.93 [0.48-1.84] | 1.19 [0.52-2.39] |
| Fetal growth restriction                                                                                                                  | 8 (11%)      | 14 (10.5%)       | 1.04 [0.46-2.38] | 1.22 [0.44-2.98] |
| Preterm delivery                                                                                                                          | 17 (22.4%)   | 27 (19.4%)       | 1.15 [0.67-1.97] | 1.54 [0.81-2.54] |
| Cesarean delivery                                                                                                                         | 15 (20%)     | 37 (27.8%)       | 0.72 [0.42-1.22] | 0.84 [0.43-1.46] |
| Breastfeeding at discharge                                                                                                                | 60 (80%)     | 97 (74.1%)       | 1.08 [0.93-1.28] | 1.08 [0.87-1.21] |
| Attendance at 1 or more postpartum visits                                                                                                 | 42 (54.6%)   | 77 (55.4%)       | 0.98 [0.76-1.27] | 0.92 [0.63-1.21] |
| Abbreviations: adjusted relative risk; CI, confidence interval; N/A, not applicable; PCU-H, high prenatal cannabis use; RR, relative risk |              |                  |                  |                  |
| *aRR for maternal outcomes were adjusted for area of deprivation index >= 75%ile, obesity, and cotinine positivity                        |              |                  |                  |                  |

|                 | PCU-H (n=77) | Controls (n=139) | RR (95% CI)             | *aRR (95% CI)    |
|-----------------|--------------|------------------|-------------------------|------------------|
| SGA < 5ile      | 10 (13.2%)   | 6 (4.32%)        | <b>3.05 [1.15-8.06]</b> | 1.44 [0.39-4.68] |
| SGA < 10ile     | 23 (30.3%)   | 18 (13%)         | <b>2.34 [1.35-4.05]</b> | 1.53 [0.72-2.88] |
| LGA             | 1 (1.3%)     | 8 (5.8%)         | 0.23 [0.03-1.79]        | 0.16 [0.02-1.59] |
| 5 min Agpar < 7 | 1 (1.3%)     | 9 (6.6%)         | 0.2 [0.03-1.54]         | 0.15 [0.02-1.34] |

|                                                                                                                                                                                                                                                                                       |               |                  |                         |                  |
|---------------------------------------------------------------------------------------------------------------------------------------------------------------------------------------------------------------------------------------------------------------------------------------|---------------|------------------|-------------------------|------------------|
| NICU admission                                                                                                                                                                                                                                                                        | 11 (14.9%)    | 24 (17.7%)       | 0.84 [0.44-1.62]        | 0.81 [0.35-1.71] |
|                                                                                                                                                                                                                                                                                       | PCU-H (n=77)  | PCU-L (n=180)    | RR (95% CI)             | *aRR (95% CI)    |
| SGA < 5ile                                                                                                                                                                                                                                                                            | 10 (13.2%)    | 21 (11.8%)       | 1.11 [0.55-2.25]        | 0.73 [0.29-1.71] |
| SGA < 10ile                                                                                                                                                                                                                                                                           | 23 (30.3%)    | 43 (24.2%)       | 1.25 [0.81-1.92]        | 1.05 [0.6-1.69]  |
| LGA                                                                                                                                                                                                                                                                                   | 1 (1.3%)      | 4 (2.3%)         | 0.59 [0.07-5.15]        | 0.77 [0.08-6.27] |
| 5 min Agpar < 7                                                                                                                                                                                                                                                                       | 1 (1.3%)      | 8 (4.9%)         | 0.27 [0.03-2.12]        | 0.28 [0.03-2.12] |
| NICU admission                                                                                                                                                                                                                                                                        | 11 (14.9%)    | 32 (18.7%)       | 0.79 [0.42-1.49]        | 0.82 [0.39-1.61] |
|                                                                                                                                                                                                                                                                                       | PCU-L (n=180) | Controls (n=139) | RR (95% CI)             | *aRR (95% CI)    |
| SGA < 5ile                                                                                                                                                                                                                                                                            | 21 (11.8%)    | 6 (4.3%)         | <b>2.73 [1.13-6.59]</b> | 1.8 [0.69-4.31]  |
| SGA < 10ile                                                                                                                                                                                                                                                                           | 43 (24.2%)    | 18 (13%)         | <b>1.87 [1.12-3.09]</b> | 1.31 [0.71-2.24] |
| LGA                                                                                                                                                                                                                                                                                   | 4 (2.3%)      | 8 (5.8%)         | 0.39 [0.12-1.27]        | 0.45 [0.12-1.59] |
| 5 min Agpar < 7                                                                                                                                                                                                                                                                       | 8 (4.9%)      | 9 (6.6%)         | 0.74 [0.29-1.86]        | 0.66 [0.24-1.71] |
| NICU admission                                                                                                                                                                                                                                                                        | 32 (18.7%)    | 24 (17.7%)       | 1.06 [0.66-1.71]        | 0.97 [0.5-1.74]  |
| Abbreviations: aRR, adjusted relative risk ; CI, confidence interval; N/A, not applicable; LGA, large for gestational age; NICU, neonatal intensive care unit; PCU-H, high prenatal cannabis use; PCU-L, low prenatal cannabis use; RR, relative risk; SGA, small for gestational age |               |                  |                         |                  |
| *aRR for neonatal outcomes were adjusted for area of deprivation index >= 75%ile and cotinine positivity                                                                                                                                                                              |               |                  |                         |                  |

|                                                               | PCU+c (N= 110)   | PCU-c (N= 147)   | P value |
|---------------------------------------------------------------|------------------|------------------|---------|
| Maternal age in years (median, [range])                       | 24.9 [18.8-38.6] | 26.1 [19.1-39.2] | 0.093   |
| AMA                                                           | 3 (2.7%)         | 7 (4.8%)         | 0.404   |
| Teen                                                          | 10 (9.1%)        | 11 (7.5%)        | 0.641   |
| Maternal BMI at intake (kg/m <sup>2</sup> ) (median, [range]) | 28.2 [15.5-66.6] | 27.1 [15.8-58.1] | 0.929   |
| Education beyond high school                                  | 26 (25.5%)       | 44 (32.4%)       | 0.25    |
| Marital status                                                |                  |                  | 0.208   |
| Single                                                        | 20 (66.7%)       | 30 (51.7%)       |         |
| Partnered/Married                                             | 9 (30%)          | 27 (46.6%)       |         |
| Divorced/Separated                                            | 1 (3.3%)         | 0                |         |
| Widowed                                                       | 0                | 0                |         |
| Other                                                         | 0                | 1 (1.7%)         |         |
| ADI (national)                                                | 94 [31-100]      | 89 [34-100]      | 0.017   |
| ADI >=75%ile                                                  | 88 (86.3%)       | 100 (74.1%)      | 0.022   |
| Race                                                          |                  |                  | 0.413   |
| Black or African American                                     | 100 (91.7%)      | 127 (87%)        |         |
| White                                                         | 9 (8.3%)         | 16 (11%)         |         |
| American Indian/Alaska N                                      | 0                | 2 (1.4%)         |         |
| Asian                                                         | 0                | 0                |         |
| Hawaiian N. & Pacific Is.                                     | 0                | 0                |         |
| Other                                                         | 0                | 1 (0.7%)         |         |
| Ethnicity                                                     |                  |                  |         |
| Hispanic                                                      | 2 (1.8%)         | 3 (2.0%)         |         |

|                                                                                                                                                                                                           |             |             |       |
|-----------------------------------------------------------------------------------------------------------------------------------------------------------------------------------------------------------|-------------|-------------|-------|
| Non-Hispanic                                                                                                                                                                                              | 107 (98.2%) | 144 (98%)   |       |
| Gravity (median, [range])                                                                                                                                                                                 | 2 (1-6)     | 2 (1-6)     | 0.971 |
| Prior live births (median, [range])                                                                                                                                                                       | 1 (0-5)     | 1 (0-5)     | 0.677 |
| Concurrent medical conditions                                                                                                                                                                             |             |             |       |
| Chronic hypertension                                                                                                                                                                                      | 21 (20.2%)  | 30 (21.6%)  | 0.792 |
| Chronic diabetes                                                                                                                                                                                          | 2 (1.9%)    | 5 (3.7%)    | 0.406 |
| Asthma                                                                                                                                                                                                    | 33 (31.4%)  | 43 (31%)    | 0.934 |
| Anemia                                                                                                                                                                                                    | 39 (37.1%)  | 56 (40.6%)  | 0.587 |
| Psychiatric diagnosis                                                                                                                                                                                     | 55 (52.4%)  | 68 (49%)    | 0.592 |
| Prior obstetric outcomes                                                                                                                                                                                  |             |             |       |
| Preterm birth                                                                                                                                                                                             | 25 (23.4%)  | 28 (19.4%)  | 0.452 |
| Hypertensive disorders of pregnancy                                                                                                                                                                       | 23 (22.1%)  | 15 (10.8%)  | 0.016 |
| Gestational diabetes                                                                                                                                                                                      | 4 (3.9%)    | 4 (3.1%)    | 0.745 |
| Gestational age at delivery (weeks)                                                                                                                                                                       | 39 [24-40]  | 38 [27-41]  | 0.608 |
| Attendance at 3 or more prenatal visits                                                                                                                                                                   | 104 (99.1%) | 136 (98.6%) | 0.728 |
| Abbreviations: ADI, area of deprivation index; BMI, body mass index; kg, kilograms; m, meters; PCU+c, prenatal cannabis use with cotinine positivity; PCU-c, prenatal cannabis use with negative cotinine |             |             |       |
| *Other indicates that the participant did not self-report a specific race                                                                                                                                 |             |             |       |

**Table 8: Birthing person outcomes among PCU patients by cotinine status**

|                                                                                                                                                                                                                    | PCU+cot<br>(n=110) | PCU-cot<br>(n=147) | RR (95% CI)             | *aRR (95% CI)           |
|--------------------------------------------------------------------------------------------------------------------------------------------------------------------------------------------------------------------|--------------------|--------------------|-------------------------|-------------------------|
| Antenatal Complications                                                                                                                                                                                            |                    |                    |                         |                         |
| Gestational diabetes                                                                                                                                                                                               | 1 (1.0%)           | 6 (4.4%)           | 0.22 [0.02-1.8]         | 0.21 [0.02-1.78]        |
| Anemia                                                                                                                                                                                                             | 32 (88.9%)         | 50 (89.3%)         | 1.0 [0.86-1.15]         | 0.93 [0.6-1.06]         |
| Gestational hypertension                                                                                                                                                                                           | 24 (23.3%)         | 22 (16.1%)         | 1.45 [0.86-1.44]        | 1.44 [0.83-2.31]        |
| Preeclampsia                                                                                                                                                                                                       | 10 (9.8%)          | 21 (15.4%)         | 0.63 [0.31-1.29]        | 0.66 [0.30-1.33]        |
| Fetal growth restriction                                                                                                                                                                                           | 11 (10.5%)         | 13 (9.4%)          | 1.12 [0.52-2.4]         | 1.16 [0.49-2.51]        |
| Preterm delivery                                                                                                                                                                                                   | 16 (14.7%)         | 26 (17.9%)         | 0.82 [0.46-1.45]        | 0.83 [0.43-1.52]        |
| Cesarean delivery                                                                                                                                                                                                  | 20 (19.4%)         | 33 (24.3%)         | 0.80 [0.49-1.31]        | 0.81 [0.46-1.35]        |
| Breastfeeding at discharge                                                                                                                                                                                         | 87 (83.7%)         | 106 (80.9%)        | 1.03 [0.92-1.16]        | 1.03 [0.88-1.13]        |
| Attendance at 1 or more postpartum visits                                                                                                                                                                          | 75 (68.2%)         | 80 (54.4%)         | <b>1.25 [1.03-1.52]</b> | <b>1.25 [1.00-1.45]</b> |
| Abbreviations: adjusted relative risk; CI, confidence interval; N/A, not applicable; PCU+c, prenatal cannabis use with cotinine positivity; PCU-c, prenatal cannabis use with negative cotinine; RR, relative risk |                    |                    |                         |                         |
| *aRR for maternal outcomes were adjusted for area of deprivation index >= 75%ile and obesity                                                                                                                       |                    |                    |                         |                         |

**Table 9: Neonatal outcomes by cotinine status**

|                 | PCU+cot (n=110) | PCU-cot (n=147) | RR (95% CI)             | *aRR (95% CI)          |
|-----------------|-----------------|-----------------|-------------------------|------------------------|
| SGA < 5ile      | 19 (17.4%)      | 12 (8.3%)       | <b>2.1 [1.07-4.15]</b>  | <b>2.7 [1.21-5.38]</b> |
| SGA < 10ile     | 39 (35.8%)      | 27 (18.6%)      | <b>1.92 [1.26-2.93]</b> | <b>2.4 [1.51-3.48]</b> |
| LGA             | 0 (0)           | 5 (3.5%)        | N/A                     | N/A                    |
| 5 min Agpar < 7 | 4 (3.9%)        | 5 (3.6%)        | 1.08 [0.3-3.93]         | 0.94 [0.25-3.27]       |
| NICU admission  | 18 (17.4%)      | 25 (17.9%)      | 0.96 [0.55-1.66]        | 0.84 [0.43-1.53]       |

|                                                                                                                                                                                                                                                                                                                              | PCU+cot (n=110) | Controls (n=124) | RR (95% CI)             | *aRR (95% CI)           |
|------------------------------------------------------------------------------------------------------------------------------------------------------------------------------------------------------------------------------------------------------------------------------------------------------------------------------|-----------------|------------------|-------------------------|-------------------------|
| SGA < 5ile                                                                                                                                                                                                                                                                                                                   | 19 (17.4%)      | 6 (4.8%)         | <b>3.60 [1.50-8.69]</b> | <b>3.29 [1.33-6.95]</b> |
| SGA < 10ile                                                                                                                                                                                                                                                                                                                  | 39 (35.8%)      | 16 (12.9%)       | <b>2.77 [1.64-4.67]</b> | <b>2.75 [1.64-4.13]</b> |
| LGA                                                                                                                                                                                                                                                                                                                          | 0 (0%)          | 6 (4.8%)         | Unable to calc          | Unable to calc          |
| 5 min Agpar < 7                                                                                                                                                                                                                                                                                                              | 4 (3.9%)        | 8 (6.6%)         | 0.59 [0.18-1.91]        | 0.53 [0.16-1.69]        |
| NICU admission                                                                                                                                                                                                                                                                                                               | 18 (17.1%)      | 22 (18.2%)       | 0.94 [0.54-1.66]        | 0.78 [0.4-1.44]         |
|                                                                                                                                                                                                                                                                                                                              | PCU-cot (n=110) | Controls (n=124) | RR (95% CI)             | *aRR (95% CI)           |
| SGA < 5ile                                                                                                                                                                                                                                                                                                                   | 12 (8.3%)       | 6 (4.8%)         | 1.71 [0.66-4.42]        | 1.15 [0.40-3.05]        |
| SGA < 10ile                                                                                                                                                                                                                                                                                                                  | 27 (18.6%)      | 16 (12.9%)       | 1.44 [0.82-2.55]        | 1.15 [0.59-2.08]        |
| LGA                                                                                                                                                                                                                                                                                                                          | 5 (3.5%)        | 6 (4.8%)         | 0.71 [0.22-2.28]        | 0.87 [0.25-2.81]        |
| 5 min Agpar < 7                                                                                                                                                                                                                                                                                                              | 8 (6.6%)        | 5 (3.6%)         | 0.55 [0.18-1.63]        | 0.51 [0.16-1.49]        |
| NICU admission                                                                                                                                                                                                                                                                                                               | 22 (18.2%)      | 25 (17.9%)       | 0.98 [0.58-1.65]        | 0.87-0.48]              |
| Abbreviations: aRR, adjusted relative risk ; CI, confidence interval; N/A, not applicable; LGA, large for gestational age; NICU, neonatal intensive care unit; PCU+c, prenatal cannabis use with cotinine positivity; PCU-c, prenatal cannabis use with negative cotinine; RR, relative risk; SGA, small for gestational age |                 |                  |                         |                         |
| *aRR for neonatal outcomes were adjusted for area of deprivation index >= 75%ile                                                                                                                                                                                                                                             |                 |                  |                         |                         |
